# Supplementary material for: Draft genome sequence of Microbacterium oleivorans strain Wellendorf implicates heterotrophic versatility and bioremediation potential
Source: PubMed Central journal article supplement — Genom Data. 2016 Sep 17;10:54–60. doi: 10.1016/j.gdata.2016.09.005 (PMC5035333; doi:10.1016/j.gdata.2016.09.005), 2016-09-17
Supplement: mmc2.pdf [file mmc2.pdf]

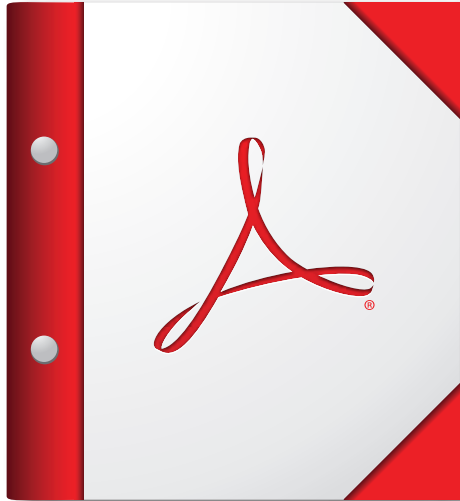

**For the best experience, open this PDF portfolio in  
Acrobat 9 or Adobe Reader 9, or later.**

[Get Adobe Reader Now!](#)
